# Supplementary material for: Methods for capturing and analyzing adaptations: implications for implementation research
Source: Implement Sci. 2022 Jul 29;17:51. doi: 10.1186/s13012-022-01218-3 (PMC9335955; doi:10.1186/s13012-022-01218-3)
Supplement: Supplementary file 1 — Additional file 1. FRAME. [file 13012_2022_1218_MOESM1_ESM.xlsx]

## Sheet: Sheet1
Condition	Practice ID	Interviewee role	What is the adaptation	Adaptation Type	What was adapted	Reason for adaptation (why was it adapted)	Why it was adapted (FRAME)	Adaptation level (planning)	Adaptation level (fidelity)	Delivery level	Context modifier	Who was involved	When did it occur	For how long did it occur	Implications for time, cost, expertise, etc.	What made the change go well or not go well
